# Supplementary material for: Designing a Graphene Coating-Based Supercapacitor with Lithium Ion Electrolyte: An Experimental and Computational Study via Multiscale Modeling
Source: MDPI journal article supplement (doi:10.3390/nano11112899), 2021-10-29
Supplement: s1 [file s1]

# Designing a Graphene Coating-Based Supercapacitor with Lithium Ion Electrolyte: An Experimental and Computational Study via Multiscale Modeling

Joseph Paul Baboo <sup>1</sup>, Shumaila Babar <sup>1</sup>, Dhaval Kale <sup>1</sup>, Constantina Lekakou <sup>1,\*</sup> and Giuliano M. Laudone <sup>2</sup>

<sup>1</sup> Centre for Engineering Materials, Department of Mechanical Engineering Sciences, Faculty of Engineering and Physical Sciences, University of Surrey, Guildford GU2 7XH, UK; j.baboo@surrey.ac.uk (J.P.B.); shumaila.babar@surrey.ac.uk (S.B.); dk00197@surrey.ac.uk (D.K.)

<sup>2</sup> Faculty of Science and Engineering, University of Plymouth, Plymouth PL4 8AA, UK; G.Laudone@plymouth.ac.uk

\* Correspondence: c.lekakou@surrey.ac.uk

## SIMULATION INPUT DATA

**Table SI-1.** Values of parameters and properties of the electrolyte system used as input data in the continuum simulation in section 4.4

| Electrolyte                                                                                                                                       | 1 M LiPF <sub>6</sub> /EC:DMC<br>50:50 v/v                           | Electrolyte                                                                                                                                       | 1 M TEABF <sub>4</sub> /ACN   |
|---------------------------------------------------------------------------------------------------------------------------------------------------|----------------------------------------------------------------------|---------------------------------------------------------------------------------------------------------------------------------------------------|-------------------------------|
| Solvent viscosity $\eta_o$ (mPa s)                                                                                                                | 0.88 [1]                                                             | Solvent viscosity $\eta_o$ (mPa s)                                                                                                                | 0.34 [6]                      |
| Solvent dielectric constant, $\epsilon_r$                                                                                                         | 41<br>taken as average of<br>interpolated values<br>from [2] and [3] | Solvent dielectric constant, $\epsilon_r$                                                                                                         | 36 [7]                        |
| Desolvated Li <sup>+</sup><br>$d_{Li^+}$ (nm)<br>$d_{Li^+,min}$ (nm)<br>$d_{Li^+,max}$ (nm)<br>$V_{Li^+}$ (nm <sup>3</sup> )                      | 0.18<br>0.18<br>0.18<br>0.00305                                      | Desolvated TEA <sup>+</sup><br>$d_{TEA^+}$ (nm)<br>$d_{TEA^+,min}$ (nm)<br>$d_{TEA^+,max}$ (nm)<br>$V_{TEA^+}$ (nm <sup>3</sup> )                 | 0.706<br>0.706<br>1<br>0.261  |
| Adsorption energy<br>of desolvated Li <sup>+</sup> :<br>$\Delta E_{Li^+/xGNP}$ slit pore<br>(kJ mol <sup>-1</sup> )                               | -99.26                                                               | Adsorption energy<br>of desolvated TEA <sup>+</sup> :<br>$\Delta E_{TEA^+/a-MWGO}$ slit pore<br>(kJ mol <sup>-1</sup> )                           | -48                           |
| Desolvated PF <sub>6</sub> <sup>-</sup><br>$d_{PF_6^-}$ (nm)<br>$d_{PF_6^-,min}$ (nm)<br>$d_{PF_6^-,max}$ (nm)<br>$V_{PF_6^-}$ (nm <sup>3</sup> ) | 0.5<br>0.5<br>0.5<br>0.0654                                          | Desolvated BF <sub>4</sub> <sup>-</sup><br>$d_{BF_4^-}$ (nm)<br>$d_{BF_4^-,min}$ (nm)<br>$d_{BF_4^-,max}$ (nm)<br>$V_{BF_4^-}$ (nm <sup>3</sup> ) | 0.46<br>0.46<br>0.46<br>0.051 |
| Adsorption energy<br>for desolvated PF <sub>6</sub> <sup>-</sup> :<br>$\Delta E_{PF_6^-/xGNP}$ slit pore<br>(kJ mol <sup>-1</sup> )               | -28.3                                                                | Adsorption energy<br>for desolvated BF <sub>4</sub> <sup>-</sup> :<br>$\Delta E_{BF_4^-/a-MWGO}$ slit pore<br>(kJ mol <sup>-1</sup> )             | -19.2                         |
| Solvated<br>Li <sup>+</sup> /EC:DMC:<br>$d_{Li^+/EC:DMC}$ (nm)<br>$d_{Li^+/EC:DMC,min}$ (nm)<br>$d_{Li^+/EC:DMC,max}$ (nm)                        | 0.79<br>0.79<br>1.16                                                 | Solvated<br>TEA <sup>+</sup> /ACN<br>$d_{TEA^+/ACN}$ (nm)<br>$d_{TEA^+/ACN,min}$ (nm)<br>$d_{TEA^+/ACN,max}$ (nm)                                 | 1.11<br>1.11<br>1.54          |

|                                                                                                                                                                                 |                      |                                                                                                                                                                     |                      |
|---------------------------------------------------------------------------------------------------------------------------------------------------------------------------------|----------------------|---------------------------------------------------------------------------------------------------------------------------------------------------------------------|----------------------|
| $n_{\text{Li+}/\text{EC:DMC}}$                                                                                                                                                  | 4                    | $n_{\text{TEA+}/\text{ACN}}$                                                                                                                                        | 15.5 [8]             |
| $E_{\text{Li+}/\text{EC:DMC}}$ (kJ/mol)                                                                                                                                         | -65.6                | $E_{\text{TEA+}/\text{ACN}}$ (kJ/mol)                                                                                                                               | -222 [8]             |
| Desolvation:<br>$\Delta n_{\text{Li+}/\text{EC:DMC}}$                                                                                                                           | 4                    | Desolvation:<br>$\Delta n_{\text{TEA+}/\text{ACN}}$                                                                                                                 | 9.5 [8]              |
| Solvated<br>$\text{PF}_6/\text{EC:DMC}$ :<br>$d_{\text{PF}_6/\text{EC:DMC}}$ (nm)<br>$=d_{\text{PF}_6/\text{EC:DMC},\text{min}}$<br>$=d_{\text{PF}_6/\text{EC:DMC},\text{max}}$ | 0.79<br>0.79<br>1.41 | Solvated<br>$\text{BF}_4/\text{ACN}$ :<br>$d_{\text{BF}_4/\text{ACN}}$ (nm)<br>$=d_{\text{BF}_4/\text{ACN},\text{min}}$<br>$=d_{\text{BF}_4/\text{ACN},\text{max}}$ | 0.86<br>0.86<br>1.45 |
| $n_{\text{PF}_6/\text{EC:DMC}}$                                                                                                                                                 | 4                    | $n_{\text{BF}_4/\text{ACN}}$                                                                                                                                        | 6.75 [8]             |
| $E_{\text{PF}_6/\text{EC:DMC}}$ (kJ/mol)                                                                                                                                        | -6.7                 | $E_{\text{BF}_4/\text{ACN}}$ (kJ/mol)                                                                                                                               | -196 [8]             |
| $\Delta n_{\text{PF}_6/\text{EC:DMC}}$                                                                                                                                          | 4                    | $\Delta n_{\text{BF}_4/\text{ACN}}$                                                                                                                                 | 3.4 [8]              |
| Conductivity<br>$\sigma_2$ ( $\text{S m}^{-1}$ )                                                                                                                                | 1.14 [4-5]           | Conductivity<br>$\sigma_2$ ( $\text{S m}^{-1}$ )                                                                                                                    | 6 [9]                |

**Table SI-2.** Input data for the electrodes xGNP-750 and a-MWGO [10] for the continuum simulations in section 4.4

**Table SI-2a.** Input data for the electrode xGNP-750; coating thickness = 60  $\mu\text{m}$ ; coating areal density = 1.10  $\text{mg cm}^{-2}$  (from the experimental part of this study)

| No                                           | 1                | 2        | 3        | 4      | 5       | 6       | 7       | 8        |
|----------------------------------------------|------------------|----------|----------|--------|---------|---------|---------|----------|
| $d_p$ (nm)                                   | $15 \times 10^3$ | 144.66   | 87.23    | 50.32  | 32.16   | 19.52   | 12.83   | 9.93     |
| $\Delta V_p$ ( $\text{cm}^3 \text{g}^{-1}$ ) | 2.127            | 0.03055  | 0.05415  | 0.0857 | 0.1815  | 0.0891  | 0.0892  | 0.1476   |
| No                                           | 9                | 10       | 11       | 12     | 13      | 14      | 15      | 16       |
| $d_p$ (nm)                                   | 6.89             | 3.46     | 1.97     | 1.61   | 1.41    | 1.31    | 0.635   | 0.5725   |
| $\Delta V_p$ ( $\text{cm}^3 \text{g}^{-1}$ ) | 0.1125           | 0.059951 | 0.018438 | 0.0142 | 0.00913 | 0.01887 | 0.00515 | 0.007267 |
| No                                           | 17               |          |          |        |         |         |         |          |
| $d_p$ (nm)                                   | 0.3788           |          |          |        |         |         |         |          |
| $\Delta V_p$ ( $\text{cm}^3 \text{g}^{-1}$ ) | 0.00054          |          |          |        |         |         |         |          |

**Table SI-2b.** Input data for the electrode a-MWGO, derived from the processing and discretisation of the PSD in [10]; coating thickness = 60  $\mu\text{m}$ ; coating areal density = 1.25  $\text{mg cm}^{-2}$  [10]

| No                                              | 1      | 2       | 3      | 4       | 5      | 6      | 7       | 8      |
|-------------------------------------------------|--------|---------|--------|---------|--------|--------|---------|--------|
| $d_p$ (nm)                                      | 500    | 39.99   | 33.44  | 24.45   | 12.6   | 10.9   | 9.46    | 8.65   |
| $\Delta V_p$<br>( $\text{cm}^3 \text{g}^{-1}$ ) | 13.21  | 0.01018 | 0.0045 | 0.0032  | 0.0038 | 0.003  | 0.0045  | 0.0056 |
| No                                              | 9      | 10      | 11     | 12      | 13     | 14     | 15      | 16     |
| $d_p$ (nm)                                      | 8.2    | 7.65    | 7.07   | 6.84    | 6.39   | 6.11   | 5.85    | 5.72   |
| $\Delta V_p$<br>( $\text{cm}^3 \text{g}^{-1}$ ) | 0.0072 | 0.0099  | 0.0125 | 0.015   | 0.022  | 0.024  | 0.028   | 0.032  |
| No                                              | 17     | 18      | 19     | 20      | 21     | 22     | 23      | 24     |
| $d_p$ (nm)                                      | 5.47   | 5.35    | 5.17   | 4.835   | 4.73   | 4.68   | 4.42    | 4.135  |
| $\Delta V_p$<br>( $\text{cm}^3 \text{g}^{-1}$ ) | 0.0362 | 0.041   | 0.0434 | 0.0449  | 0.0478 | 0.051  | 0.055   | 0.0555 |
| No                                              | 25     | 26      | 27     | 28      | 29     | 30     | 31      | 32     |
| $d_p$ (nm)                                      | 3.95   | 3.82    | 3.7    | 3.58    | 3.5    | 3.3    | 3.2     | 3.13   |
| $\Delta V_p$<br>( $\text{cm}^3 \text{g}^{-1}$ ) | 0.1164 | 0.1130  | 0.1040 | 0.0938  | 0.0818 | 0.0688 | 0.0582  | 0.0439 |
| No                                              | 33     | 34      | 35     | 36      | 37     | 38     | 39      | 40     |
| $d_p$ (nm)                                      | 2.89   | 2.86    | 2.64   | 2.45    | 2.34   | 2.16   | 2.04    | 1.96   |
| $\Delta V_p$<br>( $\text{cm}^3 \text{g}^{-1}$ ) | 0.0375 | 0.0395  | 0.0387 | 0.0341  | 0.0304 | 0.0265 | 0.0227  | 0.024  |
| No                                              | 41     | 42      | 43     | 44      | 45     | 46     | 47      | 48     |
| $d_p$ (nm)                                      | 1.89   | 1.77    | 1.73   | 1.55    | 1.54   | 1.5    | 1.45    | 1.38   |
| $\Delta V_p$<br>( $\text{cm}^3 \text{g}^{-1}$ ) | 0.0247 | 0.0248  | 0.0255 | 0.0243  | 0.0233 | 0.0265 | 0.0235  | 0.0215 |
| No                                              | 49     | 50      | 51     | 52      | 53     | 54     | 55      | 56     |
| $d_p$ (nm)                                      | 1.32   | 1.28    | 1.24   | 1.18    | 1.11   | 1.07   | 1.01    | 0.99   |
| $\Delta V_p$<br>( $\text{cm}^3 \text{g}^{-1}$ ) | 0.0189 | 0.0154  | 0.011  | 0.0086  | 0.0055 | 0.0062 | 0.0069  | 0.0078 |
| No                                              | 57     | 58      | 59     | 60      | 61     | 62     | 63      | 64     |
| $d_p$ (nm)                                      | 0.98   | 0.935   | 0.89   | 0.855   | 0.82   | 0.78   | 0.75    | 0.72   |
| $\Delta V_p$<br>( $\text{cm}^3 \text{g}^{-1}$ ) | 0.0089 | 0.0105  | 0.0152 | 0.0151  | 0.0158 | 0.0132 | 0.01289 | 0.0103 |
| No                                              | 65     | 66      | 67     | 68      | 69     | 70     | 71      | 72     |
| $d_p$ (nm)                                      | 0.67   | 0.65    | 0.64   | 0.60    | 0.57   | 0.55   | 0.52    | 0.50   |
| $\Delta V_p$<br>( $\text{cm}^3 \text{g}^{-1}$ ) | 0.0108 | 0.0111  | 0.0147 | 0.0171  | 0.0152 | 0.0136 | 0.0125  | 0.0099 |
| No                                              | 73     | 74      | 75     | 76      | 77     |        |         |        |
| $d_p$ (nm)                                      | 0.48   | 0.46    | 0.44   | 0.42    | 0.40   |        |         |        |
| $\Delta V_p$<br>( $\text{cm}^3 \text{g}^{-1}$ ) | 0.0065 | 0.0042  | 0.0030 | 0.00135 | 0.0007 |        |         |        |

## REFERENCES

- [1] M. Dahbi, F. Ghamouss, F. Tran-Van, D. Lemordant, M. Anouti, Comparative study of EC/DMC LiTFSI and LiPF<sub>6</sub> electrolytes for electrochemical storage. *Journal of Power Sources* 196 (2011) 9743–9750.
- [2] I.N. Daniels, Z. Wang, B.B. Laird, Dielectric properties of organic solvents in an electric field. *J. Phys. Chem. C* 121 (2017) 1025–1031.
- [3] E.R. Logan, E.M. Tonita, K. L.Gering, L. Ma, M.K.G. Bauer, J. Li, L.Y. Beaulieu, J.R. Dahn, A study of the transport properties of ethylene carbonate-free Li electrolytes. *Journal of The Electrochemical Society* 165 (2018) A705-A716.
- [4] C.L. Berhaut, D. Lemordant, P. Porion, L. Timperman, G.Schmidt, M. Anouti, Ionic association analysis of LiTDI, LiFSI and LiPF<sub>6</sub> in EC/DMC for better Li-ion battery performances. *RSC Adv.* 9 (2019) 4599–4608.
- [5] “Electrolytes for lithium and lithium-ion batteries” ed. T.R. Jow, K. Xu, O.Borodin, M. Ue, 2014, Springer, New York, p.384
- [6] V. N. Afanas’ev, E.Y. Tyunina, M. D. Chekunova, The influence of temperature and concentration on viscous flow of solutions of Et<sub>4</sub>NBF<sub>4</sub> in propylene carbonate. *Russian Journal of Physical Chemistry A* 83 (2009) 2069–2073.
- [7] Z. Zhang, Y. Lai, J. Li, Y. Liu, Electrochemical behavior of wound supercapacitors with propylene carbonate and acetonitrile based nonaqueous electrolytes, *Journal of Central South University of Technology* 16 (2009) 247-252.
- [8] G. Feng, J. Huang, B.G. Sumpter, V. Meunier, R. Qiao, Structure and dynamics of electrical double layers in organic electrolytes, *Phys. Chem. Chem. Phys.* 12 (2010) 5468–5479.
- [9] J. Chmiola, C. Largeot, P.-L. Taberna, P. Simon, Y. Gogotsi, Desolvation of ions in subnanometer pores and its effect on capacitance and double-layer theory, *Angew. Chem. Int. Ed.* 47 (2008) 3392 –3399.
- [10] Y. Zhu, S. Murali, M.D. Stoller, K.J. Ganesh, W. Cai, P.J. Ferreira, A. Pirkle, R.M. Wallace, K.A. Cyhosh, M. Thommes, D. Su, E.A. Stach, R.S. Ruoff, Carbon-based supercapacitors produced by activation of graphene. *Science* 332 (2011) 1537–1541.
